# Supplementary material for: Child-Patient Perspective on Results After Correction of Sagittal Synostosis and the Difference Between Child-Patient and Parent’s Perspectives
Source: PubMed Central journal article supplement (PMC11122732; doi:10.1097/scs.0000000000010263), 2024-05-09
Supplement: scs-35-1040-s001.pdf [file scs-35-1040-s001.pdf]

# APPENDIX A

## Seven questions for children operated for sagittal synostosis

Name: .....

Age: ..... (years)

1. When I compare the shape of my head to that of others, I find it:

- |                            |                            |                            |                            |                            |
|----------------------------|----------------------------|----------------------------|----------------------------|----------------------------|
| 1 <input type="checkbox"/> | 2 <input type="checkbox"/> | 3 <input type="checkbox"/> | 4 <input type="checkbox"/> | 5 <input type="checkbox"/> |
| completely similar         | similar                    | a bit different            | different                  | very different             |

2. I find the visibility of my scar:

- |                            |                            |                            |                            |                            |
|----------------------------|----------------------------|----------------------------|----------------------------|----------------------------|
| 1 <input type="checkbox"/> | 2 <input type="checkbox"/> | 3 <input type="checkbox"/> | 4 <input type="checkbox"/> | 5 <input type="checkbox"/> |
| Unnoticeable               | Barely noticeable          | Noticeable                 | Prominent                  | Severe                     |

3. Others make remarks about the shape of my head:

- |                            |                            |                            |                            |                            |
|----------------------------|----------------------------|----------------------------|----------------------------|----------------------------|
| 1 <input type="checkbox"/> | 2 <input type="checkbox"/> | 3 <input type="checkbox"/> | 4 <input type="checkbox"/> | 5 <input type="checkbox"/> |
| never                      | almost never               | sometimes                  | often                      | quite often                |

4. I take into account the shape of my head:

- |                            |                            |                            |                            |                            |
|----------------------------|----------------------------|----------------------------|----------------------------|----------------------------|
| 1 <input type="checkbox"/> | 2 <input type="checkbox"/> | 3 <input type="checkbox"/> | 4 <input type="checkbox"/> | 5 <input type="checkbox"/> |
| never                      | rarely                     | sometimes                  | often                      | quite a lot                |

5. If I could change a part of my head, I would choose: (multiple answers can be chosen)

- |                            |                            |                            |                            |                            |
|----------------------------|----------------------------|----------------------------|----------------------------|----------------------------|
| 1 <input type="checkbox"/> | 2 <input type="checkbox"/> | 3 <input type="checkbox"/> | 4 <input type="checkbox"/> | 5 <input type="checkbox"/> |
| forehead                   | sides                      | back of head               | top of head                | nothing                    |

6. I have a headache:

- |                            |                            |                            |                            |                            |
|----------------------------|----------------------------|----------------------------|----------------------------|----------------------------|
| 1 <input type="checkbox"/> | 2 <input type="checkbox"/> | 3 <input type="checkbox"/> | 4 <input type="checkbox"/> | 5 <input type="checkbox"/> |
| never                      | sometimes                  | few times per month        | few times per week         | every day                  |

7. I'm easily distracted:

- |                            |                            |                            |                            |                            |
|----------------------------|----------------------------|----------------------------|----------------------------|----------------------------|
| 1 <input type="checkbox"/> | 2 <input type="checkbox"/> | 3 <input type="checkbox"/> | 4 <input type="checkbox"/> | 5 <input type="checkbox"/> |
| not at all                 | a bit                      | sometimes                  | regularly                  | often                      |
